# Supplementary material for: A chemometric approach for determining the reaction quantum yields in consecutive photochemical processes
Source: Royal Society of Chemistry journal article supplement (doi:10.1039/c7cp03619a), 2017-01-01
Supplement: c7cp03619a2.pdf [file c7cp03619a2.pdf]

**A Chemometric Approach for Determining the Reaction Quantum Yields in Consecutive  
Photochemical Processes**

Juan P. Marcolongo; Juan Schmidt; Natalia Levin; Leonardo D. Slep\*

Departamento de Química Inorgánica, Analítica y Química Física, Facultad de Ciencias Exactas y Naturales, and INQUIMAE, Universidad de Buenos Aires – CONICET, Pabellón 2, 3er piso, Ciudad Universitaria, C1428EHA Ciudad Autónoma de Buenos Aires, Argentina

**Figure S1:** Evolution of  $\Omega_A$  during the iterative minimization procedure with unknown spectra for the colored species in a  $A \rightarrow B$  process using  $\phi_{\text{initial}} = 0.1 \text{ mol einstein}^{-1}$  (left). Spectral changes along the iteration steps for the reactant (middle) and product (right). Initial guess colored in red, spectrum after last iteration in blue.  $\lambda_{\text{irr}} = 450 \text{ nm}$ , see Figure 2 for the spectral density of the irradiation source.

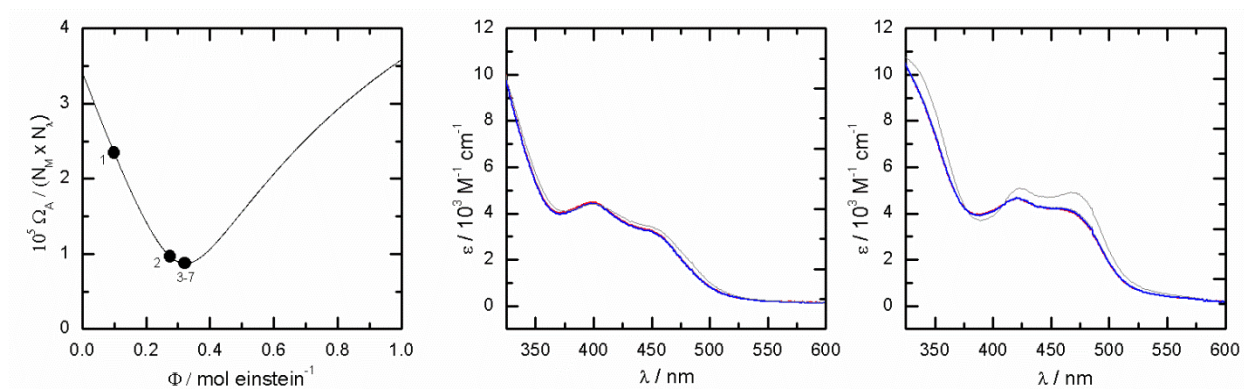

**Figure S2:** Evolution of  $\Omega_A$  during the iterative minimization procedure with unknown spectra for the colored species in a  $A \rightarrow B$  process using  $\phi_{\text{initial}} = 0.8 \text{ mol einstein}^{-1}$  (left). Spectral changes along the iteration steps for the reactant (middle) and product (right). Initial guess colored in red, spectrum after last iteration in blue.  $\lambda_{\text{irr}} = 450 \text{ nm}$ , see Figure 2 for the spectral density of the irradiation source.

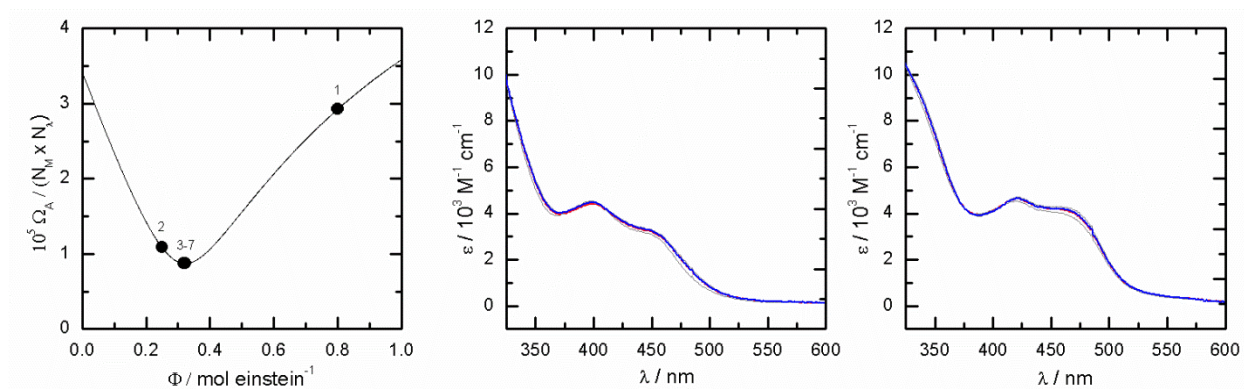

**Figure S3:** Evolution of  $\Omega_A$  during the iterative minimization procedure with unknown spectra for the colored species in a  $A \rightarrow B \rightarrow C$  process. Initial values for  $\phi_1 = 0.2$  mol einstein<sup>-1</sup> and  $\phi_2 = 0.02$  mol einstein<sup>-1</sup> (upper left). The contour plot corresponds to  $\Delta\Omega_A/(N_M \times N_\lambda) = 1 \times 10^{-5}$ . Spectral changes along the iteration steps for the reactant (upper right), intermediate (lower left) and product species (lower right). Initial guess colored in red, spectrum after last iteration in blue.  $\lambda_{\text{irr}} = 450$  nm, see Figure 5 for the spectral density of the irradiation source.

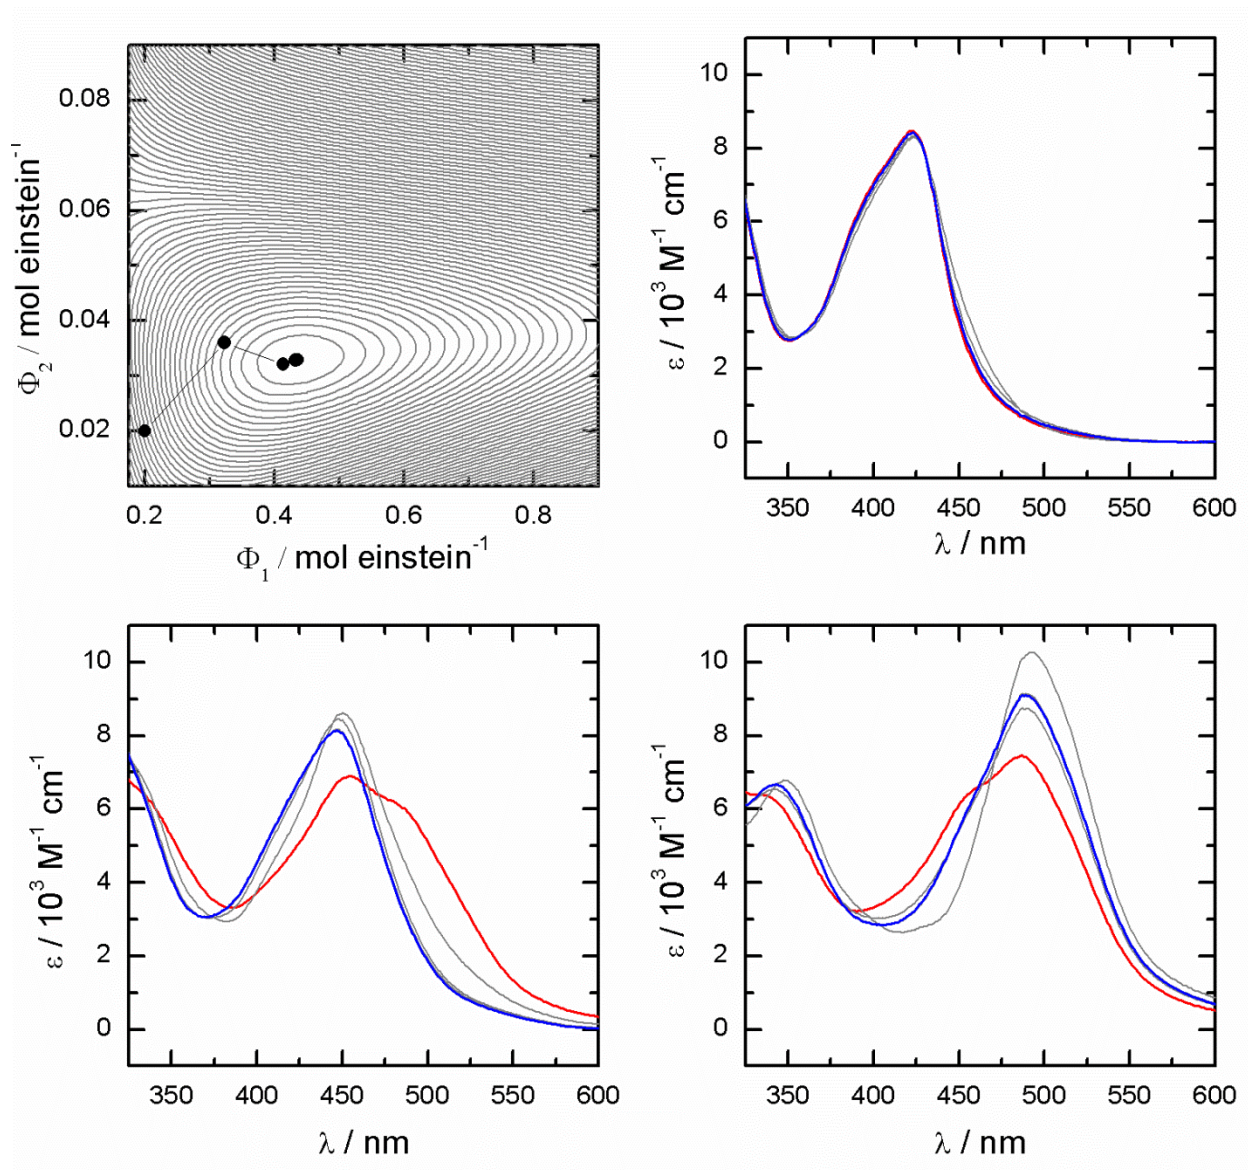

**Figure S4:** Evolution of  $\Omega_A$  during the iterative minimization procedure with unknown spectra for the colored species in a  $A \rightarrow B \rightarrow C$  process. Initial values for  $\phi_1 = 0.8$  mol einstein<sup>-1</sup> and  $\phi_2 = 0.08$  mol einstein<sup>-1</sup> (upper left). The contour plot corresponds to  $\Delta\Omega_A/(N_M \times N_\lambda) = 1 \times 10^{-5}$ . Spectral changes along the iteration steps for the reactant (upper right), intermediate (lower left) and product species (lower right). Initial guess colored in red, spectrum after last iteration in blue.  $\lambda_{\text{irr}} = 450$  nm, see Figure 5 for the spectral density of the irradiation source.

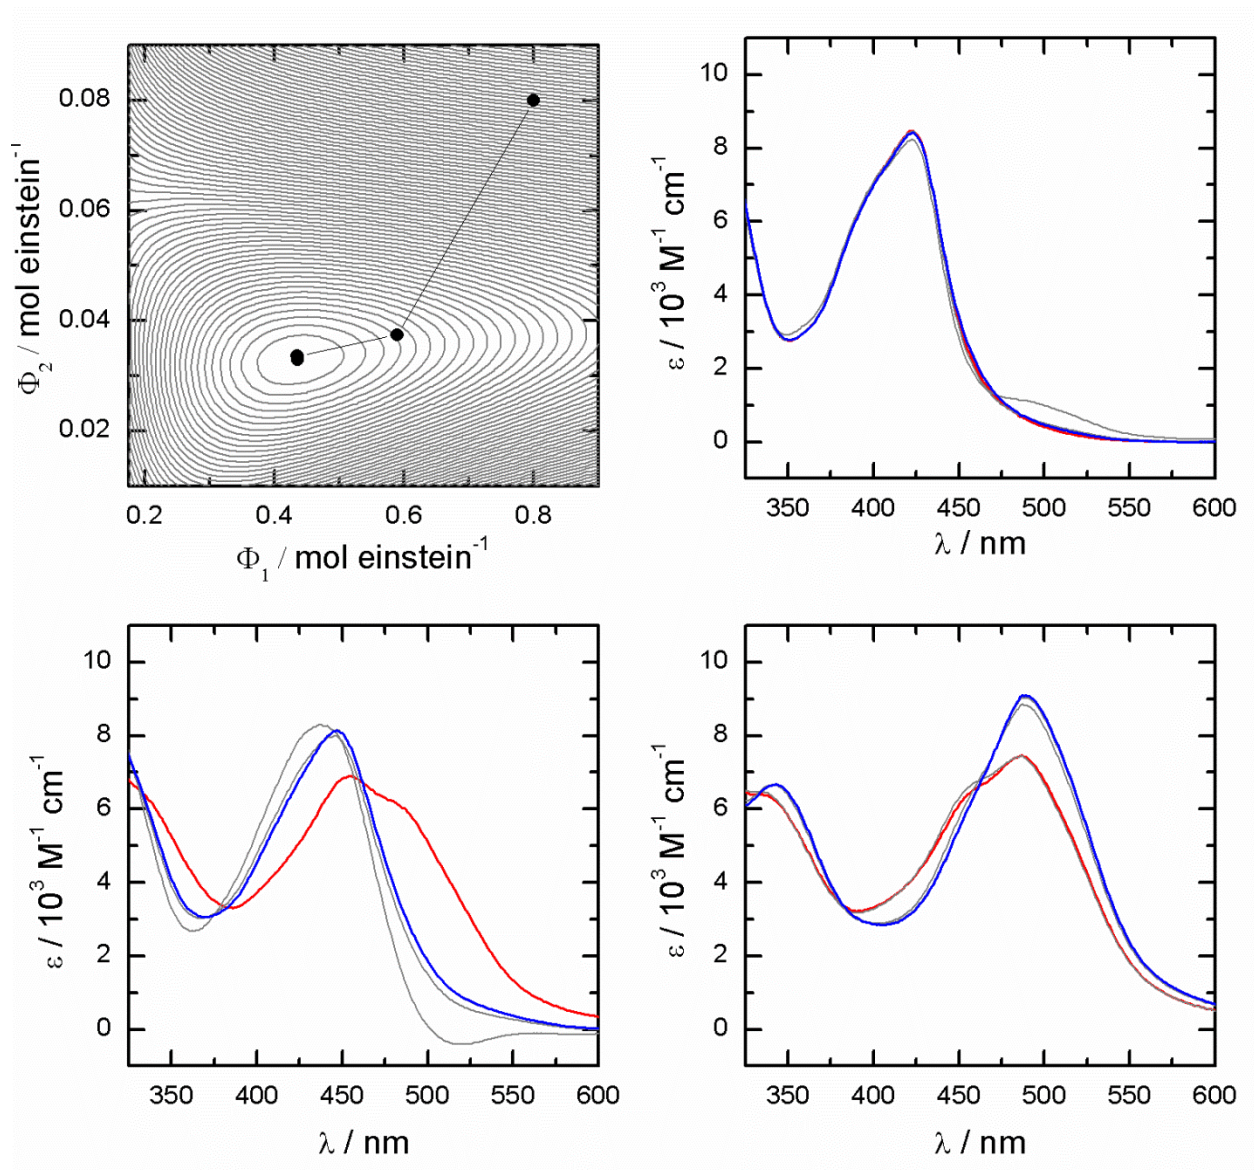

**Table S1:** List of symbols with units and dimensions involved in the procedure. Gray cells indicate dimensionless quantities.

| Symbol                    | Description                                                                                                                                          | Units                                   | Type                         |
|---------------------------|------------------------------------------------------------------------------------------------------------------------------------------------------|-----------------------------------------|------------------------------|
| $N_M$                     | Number of absorbance measurements for each $\lambda$                                                                                                 |                                         | Scalar                       |
| $N_\lambda$               | Number of wavelengths (channels) measured                                                                                                            |                                         | Scalar                       |
| $N_S$                     | Number of species involved                                                                                                                           |                                         | Scalar                       |
| $\mathbf{A}_{\text{exp}}$ | Measured absorbances                                                                                                                                 |                                         | $N_M \times N_\lambda$ array |
| $\mathbf{E}_{\text{exp}}$ | Independently measured spectra of pure species                                                                                                       | $\text{M}^{-1} \text{cm}^{-1}$          | $N_S \times N_\lambda$ array |
| $\mathbf{C}_{\text{exp}}$ | $=\mathbf{A}_{\text{exp}} \times \mathbf{E}_{\text{exp}}^{\text{t}} \times (\mathbf{E}_{\text{exp}} \times \mathbf{E}_{\text{exp}}^{\text{t}})^{-1}$ | M                                       | $N_M \times N_S$ array       |
| $\mathbf{C}$              | Concentration profiles obtained from chemical model                                                                                                  | M                                       | $N_M \times N_S$ array       |
| $\mathbf{E}$              | $=(\mathbf{C}^{\text{t}} \times \mathbf{C})^{-1} \times \mathbf{C}^{\text{t}} \times \mathbf{A}_{\text{exp}}$                                        | $\text{M}^{-1} \text{cm}^{-1}$          | $N_S \times N_\lambda$ array |
| $\mathbf{A}$              | $=\mathbf{C} \times \mathbf{E}_{\text{exp}}$ or $=\mathbf{C} \times \mathbf{E}$ , depending on the case (I, II or III)                               |                                         | $N_M \times N_\lambda$ array |
| $\mathcal{Q}_C$           | Sum of quadratic residuals between $\mathbf{C}$ and $\mathbf{C}_{\text{exp}}$                                                                        | M                                       | Scalar                       |
| $\mathcal{Q}_A$           | Sum of quadratic residuals between $\mathbf{A}$ and $\mathbf{A}_{\text{exp}}$                                                                        |                                         | Scalar                       |
| $I_0(\lambda)$            | Spectral density of the irradiation source                                                                                                           | einstein $\text{s}^{-1} \text{dm}^{-4}$ | Scalar                       |
| $\phi$                    | Quantum yield of the process                                                                                                                         | mol einstein $^{-1}$                    | Scalar                       |

**Extras:** Fitting routines and original dataset files.

Requieres Octave ver. 4.2.1 and the Optim-1.5.2 Octave-Forge package (both available free of charge from [www.gnu.org/software/octave/](http://www.gnu.org/software/octave/)).

The compressed file contains two folders with functional routines to be employed in the analysis of absorption profiles recorded from  $A \rightarrow B$  and  $A \rightarrow B \rightarrow C$  experiments. In both cases dataset files to test the procedures are provided. The data correspond to the actual experiments analyzed and discussed in the main text.
